# Supplementary material for: Large effect of phosphate-solubilizing bacteria on the growth and gene expression of Salix spp. at low phosphorus levels
Source: PubMed Central journal article supplement (PMC10495996; doi:10.3389/fpls.2023.1218617), 2023-08-29
Supplement: DataSheet_1.pdf [file DataSheet_1.pdf]

## *Supplementary Material*

### **Large effect of phosphate-solubilizing bacteria on the growth and gene expression of *Salix* spp. at low phosphorus levels**

**Piotr Koczorski, Bliss Ursula Furtado, Christel Baum, Martin Weih, Pär Ingvarsson, Piotr Hulisz and Katarzyna Hryniewicz**

**\* Correspondence:**

Katarzyna Hryniewicz; hrynk@umk.pl

**Keywords:** transcriptome analysis, willow, phosphate solubilization, phosphate-solubilizing microorganism, differential gene expression

## Supplementary Material

### **Data availability**

The reference genome of *Salix viminalis* was acquired from Almeida et al. 2020

Almeida, P., Proux-Wera, E., Churcher, A., Soler, L., Dainat, J., Pucholt, P., Nordlund, J., Martin, T., Rönnerberg-Wästljung, A.C., Nystedt, B. and Berlin, S., 2020. Genome assembly of the basket willow, *Salix viminalis*, reveals earliest stages of sex chromosome expansion. *BMC biology*, 18(1), pp.1-18.

Bacteria used in the study can be found in supplementary materials of Koczorski et al., 2022

Koczorski, P., Furtado, B. U., Gołębiewski, M., Hulisz, P., Thiem, D., Baum, C., et al. (2022). Mixed growth of *Salix* species can promote phosphate-solubilizing bacteria in the roots and rhizosphere. *Front. Microbiol.* 13. doi: 10.3389/fmicb.2022.1006722

Transcriptome data is available at <https://www.ncbi.nlm.nih.gov/bioproject>, PRJNA967604.

## Length of shoots and roots of willow cuttings

**A**

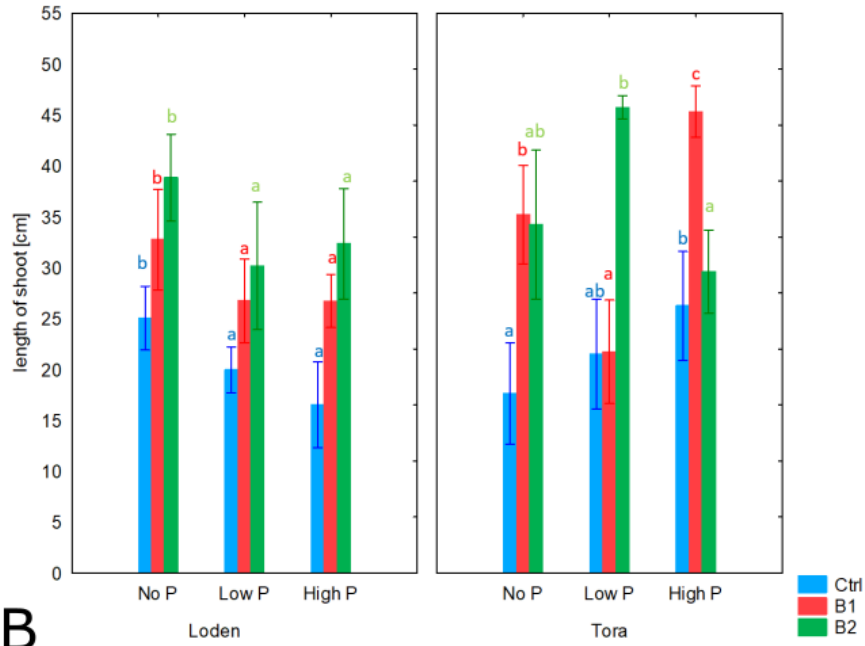

**B**

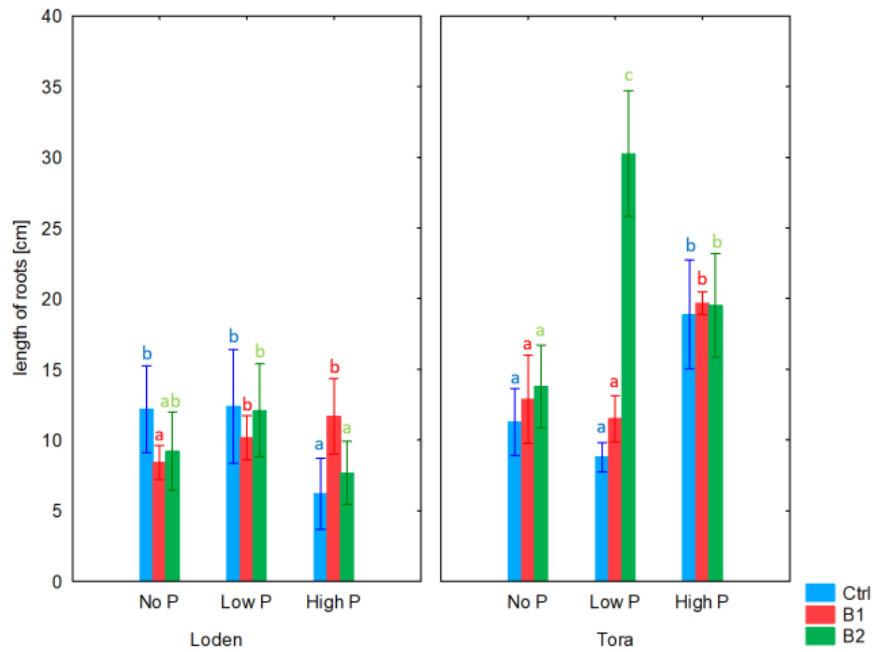

Figure 1 Length of shoots (A) and roots (B) in cm of willow cuttings from pot experiment after 5 weeks of cultivation in three different P concentrations (No P, Low P, High P). Plants were additionally inoculated with two bacterial strains B1 – red color, B2 – green color and were compared to control – blue color. Colored letters represent significant differences between P concentrations variants.

Wet weight of willow cutting  
leaves, shoots and roots

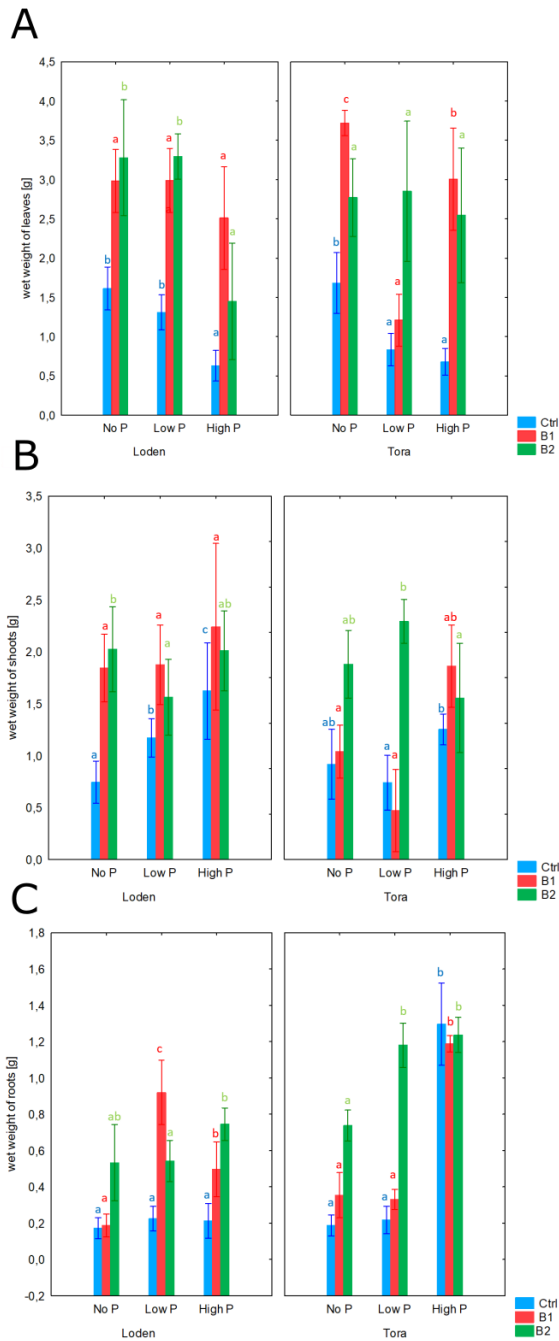

Figure 2 Weight of leaves (A) shoots (B) and roots (C) in g of willow cuttings from pot experiment after 5 weeks of cultivation in three different P concentrations (No P, Low P, High P). Plants were additionally inoculated with two bacterial strains B1 – red color, B2 – green color and were compared to control – blue color. Colored letters represent significant differences between P concentrations variants.

## P concentration in leaves and soil of willow cuttings

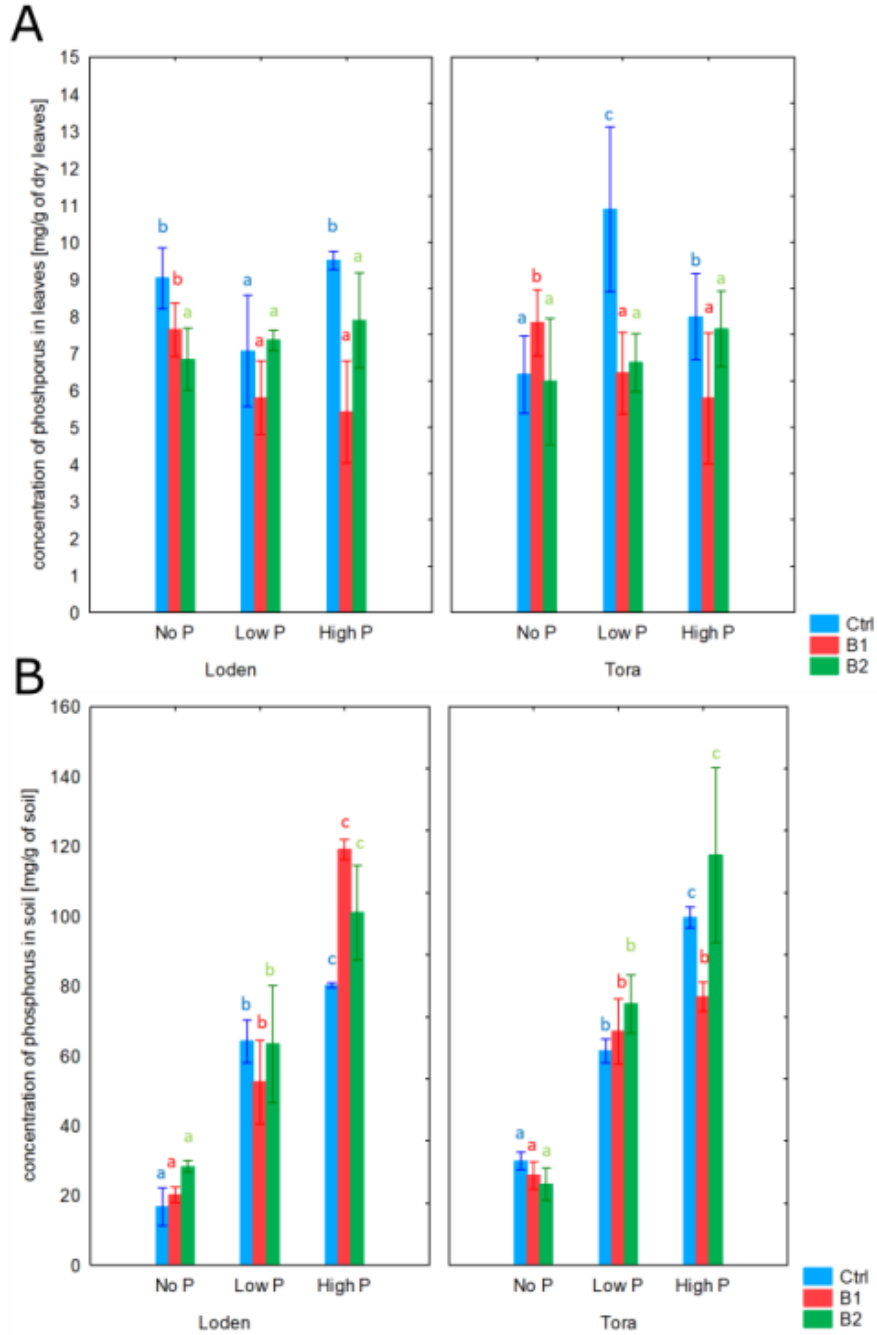

Figure 3 P content in leaves (A) soil (B) of willow cuttings from pot experiment after 5 weeks of cultivation in three different P concentrations (NoP, LowP, High P). Plants were additionally inoculated with two bacterial strains B1 – red color, B2 – green color and were compared to control – blue color. Colored letters represent significant differences between P concentrations variants.

Supplementary Material

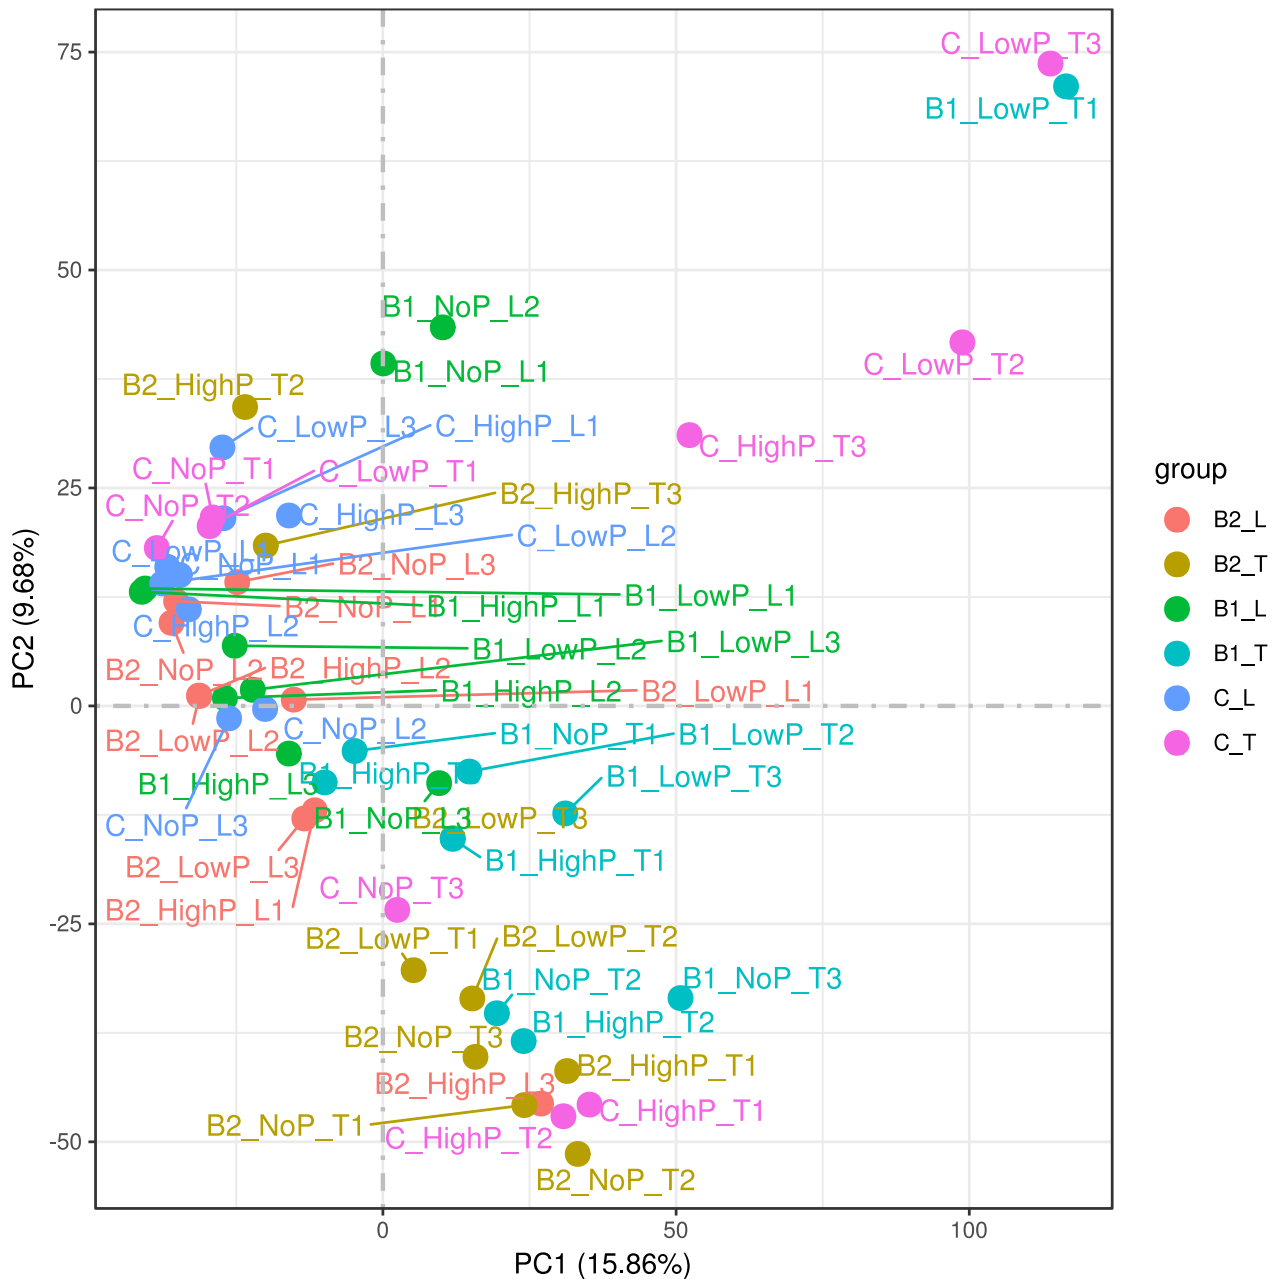

Figure 4 Principal component analysis (PCA) for all variants of experiment. Inoculation variants are denoted as follows: C – control; B1 – bacteria 1; B2 bacteria 2. Phosphate concentrations are denoted by NoP – no phosphate; LowP – low phosphate level (1M); HighP – high phosphate level (2M). Salix species used are denoted as L – Loden and T – Tora.

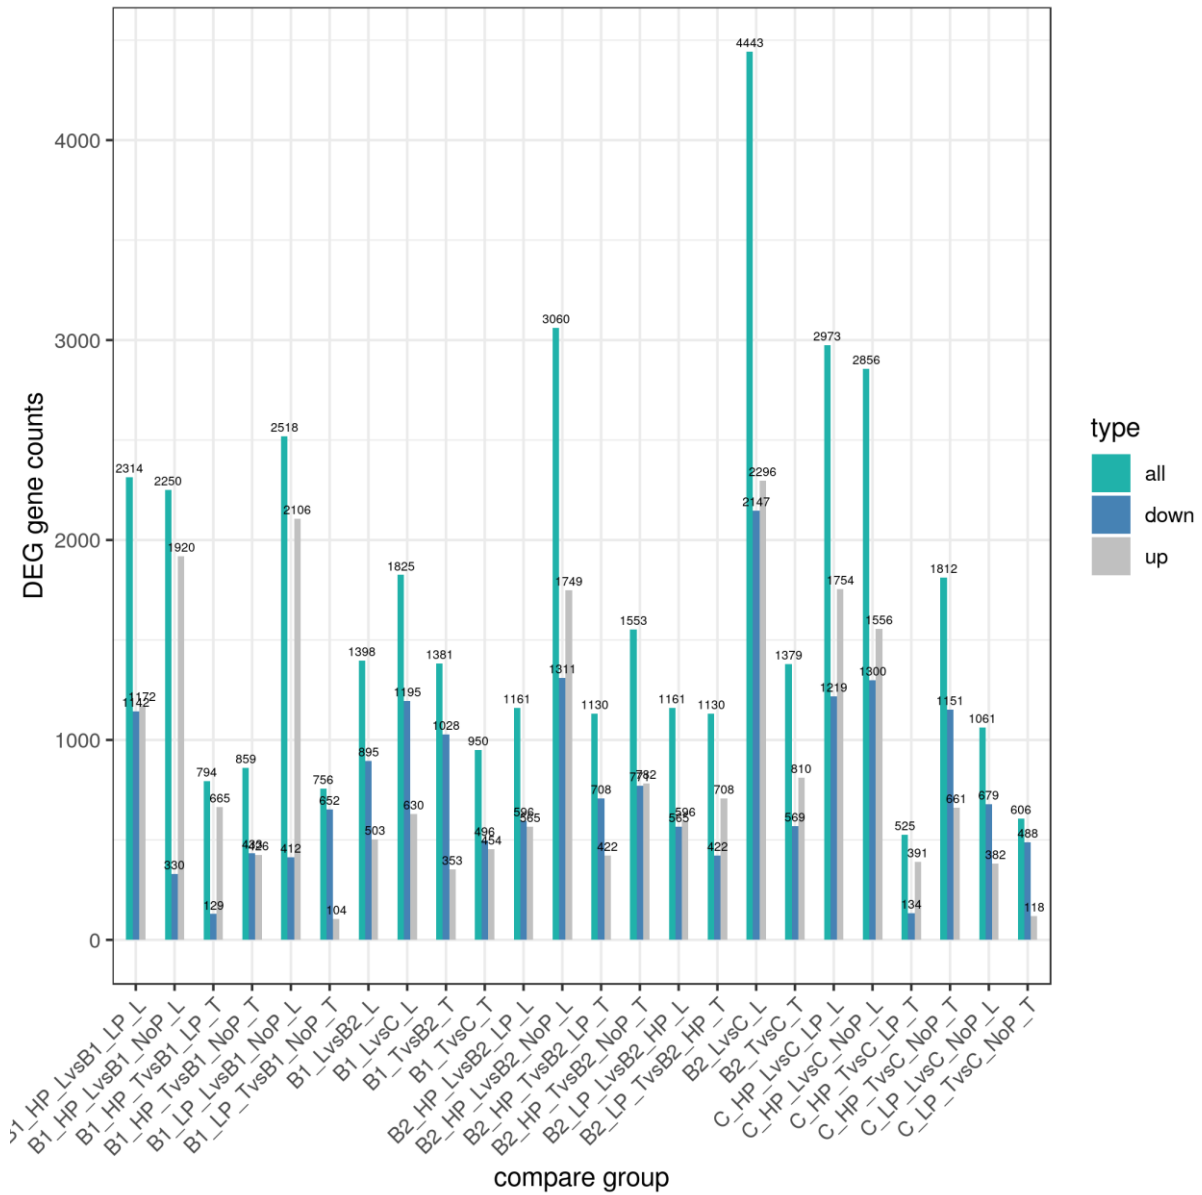

Figure 5 Gene count for each compared group represented in form of all, down regulated and up regulated genes. Second variant is always treated as reference. C –non inoculated control; B1 – Bacteria 1; B2 – Bacteria 2; HP – High P; LP – Low P.
